1 **Loss of F-box Motif Encoding Gene SAF1 and RRM3 Together Leads to**  
2 **Synthetic Growth Defect and Sensitivity to HU, MMS in *S.cerevisiae***

3 **Meenu Sharma<sup>1</sup> V. Verma<sup>1</sup>, Narendra K Bairwa<sup>1#</sup>**

4 <sup>1</sup>School of Biotechnology, Shri Mata Vaishno Devi University, Katra, Jammu & Kashmir,  
5 India- 182320

6 # To whom correspondence may be addressed: [narendra.bairwa@smvdu.ac.in](mailto:narendra.bairwa@smvdu.ac.in)

7 Tel: (91-01991) 285699/285634; Fax: (91-01991)-285694

8 **Running title: SAF1 and RRM3 function in parallel pathways during genotoxic stress**

9 **KEY WORDS: *S. cerevisiae*, F-box motif, E-3 Ligase, Stress**

10 **Abstract:**

11 Unearthing of novel genetic interaction which leads to synthetic growth defects due to  
12 inactivation of genes are needed for applications in precision medicine. The genetic  
13 interactions among the molecular players involving different biological pathways need to be  
14 investigated. The SAF1 gene of *S.cerevisiae* encodes for a protein product which contain N-  
15 terminal F-box motif and C-terminal RCC1 domain. The F-box motif interacts with  
16 Skp1 subunit of the SCF-E3 ligase and C-terminus with Aah1 (adenine deaminase) for  
17 ubiquitination and subsequent degradation by 26S proteasome during phase transition from  
18 proliferation state to quiescence phase due to nutrient limitation stress. The replication fork  
19 associated protein Rrm3 of *S.cerevisiae* belongs to Pif1 family helicase and function in  
20 removal of the non-histone proteins during replication fork movement. Here we have  
21 investigated the genetic interaction among both the genes (SAF1 and RRM3) and their role in

22 growth fitness and genome stability. The single and double gene knockout strains of  
23 SAF1 and RRM3 genes was constructed in BY4741 genetic background and checked for the  
24 growth fitness in presence of genotoxic stress causing agents such as hydroxyurea and methyl  
25 methanesulfonate. The strains were also evaluated for nuclear migration defect by DAPI  
26 staining and for HIS3AI marked Ty1 retro-transposition. The *saf1Δrrm3Δ* showed the  
27 extremely slow growth phenotype in rich medium and sensitivity to genotoxic agents such as  
28 HU and MMS in comparison to single gene mutant (*saf1Δ*, *rrm3Δ*) and WT cells. The  
29 *saf1Δrrm3Δ* also showed the defects in nuclear migration as evident by multi-nuclei  
30 phenotype. The *saf1Δrrm3Δ* also showed the elevated frequency of Ty1 retro-transposition in  
31 JC2326 background in comparison to either *saf1Δ* or *rrm3Δ*. Based on these observations we  
32 report that SAF1 and RRM3 functions in parallel pathway for growth fitness and stability  
33 of the genome.

#### 34 **Introduction:**

35 The proliferation of *Saccharomyces cerevisiae* cells from in and out of quiescence phase due  
36 to nutrients stress or availability remains an active research area for both basic research and  
37 biotechnological purpose. The phase transition process is dependent on the ubiquitin  
38 proteasome system as it was reported that ubiquitin is required for survival during starvation  
39 (1). The SCF E3-ligase component Saf1, of *S.cerevisiae* which is an F-box motif containing  
40 protein recruits the Aah1 for proteasomal mediated degradation upon nutrient deprivation (2).  
41 The *AAH1* gene of *S.cerevisiae*, encodes adenine deaminase (Aah1) which converts adenine  
42 to hypoxanthine. The nutrient deprivation condition induces stress which leads to cell enter  
43 into the quiescence phase. Besides the Aah1, the serine protease B (PRB1), protease C  
44 (PRC1), and Ybr139w, vacuolar origin proteins also have been reported as Saf1 targets for

45 proteasome mediated degradation (3, 4).The serine proteases of the vacuole plays a major  
46 role during starvation of a cell.

47 The Pif1 family helicases are well conserved from yeast to humans. In *S. cerevisiae*, RRM3  
48 gene encoded product Rrm3 belongs to Pif1 family, shows the 5-3' helicase activity during  
49 replication fork movement (5, 6). Rrm3 is involved in the chromosome replication and travels  
50 along the replication fork (7).The activity of the Rrm3 counteracted by the replication fork  
51 protection complex, Tof1/Csm3 (8). In the absence of Rrm3, replication fork pausing occurs  
52 at the ITS1 region of r-DNA, telomeric regions, and difficult to replicate sites in the  
53 chromosome (8, 9). Rrm3 was first identified as suppressor of recombination in the repeat  
54 region(10).The loss of RRM3 results in the r-DNA circle formation which suggests its role in  
55 maintenance of the r-DNA stability. The *rrm3* mutant showed the synthetic fitness defect  
56 when combined with mutation in the genome stability regulators such as MRC1, SGS1,  
57 RAD53, SRS2, MEC1 and RTT101(11-14). The RRM3 gene has also been implicated in the  
58 suppression of the Ty1, Ty2 and Ty3 element (15, 16). Here in this paper we report the  
59 genetic interactions among the SAF1 and RRM3 genes. The simultaneous deletion of both  
60 gene leads to synthetic growth defects and genomic instability. The growth fitness of the  
61 double deletion strain was even further reduced when exposed to MMS and HU in  
62 comparison to single gene mutant or WT.

## 63 **Methods**

### 64 **Strain and Plasmids**

65 BY4741 (*Mata his3Δ1 leu2Δ0 met15Δ0 ura3Δ0*) *Saccharomyces cerevisiae* strain was used  
66 for the construction of the gene deletions. Strain JC2326 (*MAT-ura3, cir0, ura3-167, leu: his,*  
67 *his32Ty1his3AI-270, Ty1NEO-588, Ty1 (tub: lacs)-146*)was used for Ty1 retro-transposition

68 assay (Table1).Following, plasmids, pFA6a- KanMX6, pFA6a- His3MX6, and  
69 pGADT7(Table 2) were used for PCR amplification of the deletion marker cassette  
70 containing 40 bp homology to the upstream and downstream of the target ORFs.

#### 71 **Growth Assay**

72 Growth assessment of the WT and mutants was carried out as mentioned (17). Growth  
73 kinetics of strains was analyzed for 14 hrs by measuring optical density at 600nm using  
74 TOSHVIN UV- 800 SHIMADZU spectrophotometer. The cultures were also streaked on the  
75 YPD plates followed by incubation at 30°C for 2-3 days.

#### 76 **Phase Contrast Microscopy**

77 For microscopy analysis, each strain was grown up to log phase in YPD medium at 30°C and  
78 imaged under Leica DM3000 microscope at 100X magnification.

#### 79 **Semi Quantitative Growth Assay**

80 To compare the growth fitness among the WT and mutants, spotting assay was performed.  
81 Wild type (BY4741 ) and its deletion derivatives strains (*saf1Δ,rrm3Δ* and *saf1Δrrm3Δ*) were  
82 grown in the 25 ml YPD (Yeast Extract 1% w/v, Peptone 2% w/v, dextrose 2% w/v) medium  
83 overnight at 30°C. The next day the cultures were diluted and grown in fresh YPD medium  
84 for 3-4hrs so as to reach early log phase (OD600 0.8-1.0). The cultures were equalized by OD  
85 at 600nm. A tenfold serial dilution was done and spotted (3μl) onto agar plates containing  
86 (YPD and YPD + HU and MMS). The plates were incubated at 30°C for 2-3 days and  
87 imaged.

#### 88 **Nuclear Migration Assay using Fluorescence microscopy**

89 For detection of nuclear migration defects, assay described in (18, 19) was adopted. The  
90 number of nuclei per cell in yeast strains was determined with nuclear binding dye (DAPI).

91 Briefly, strains were grown to early log phase ( $OD_{600} \sim 0.8$ ) at 30°C. Yeast cells were washed  
92 with distilled water and suspended in 1X PBS (Phosphate Buffer Saline). Further, fixation  
93 was done by addition of 70% ethanol before DAPI staining. Cells were washed with 1X PBS  
94 then again centrifuged for 1 minute at 2500 rpm. DAPI stain (1mg/ml stock) to final  
95 concentration of 2.5µg/ml was added and incubated for 5 minutes at room temperature and  
96 visualized under UV light of fluorescent microscope with 100X magnification. A total of 200  
97 cells were counted and grouped according 0, 1, 2 and multi nuclei per cell, more than two  
98 nuclei indicated the nuclear migration defect.

### 99 **Assay for Ty1 retro-transposition**

100 To measure the Ty1 retro-transposition frequency the method mentioned in (16, 20) was  
101 followed. Briefly, single colony of JC2326 (reporter strain) and its deletion derivative  
102 (*saf1Δ* and *rrm3Δ* and *saf1Δrrm3Δ*) strains were inoculated into 10 ml YPD broth and was  
103 grown overnight at 30°C. The overnight grown cultures were again inoculated in 5ml YPD  
104 at 1:1000 dilutions and grown up to saturation point (144hrs) at 20°C. Then saturated culture  
105 was serially diluted and plated on minimal media (SD/His<sup>-</sup> plates) followed by incubation at  
106 30°C for 3-7 days. The frequency of appearance of His3<sup>+</sup> colonies considered as measure of  
107 Ty1 retro-mobility.

### 108 **Statistical methods:**

109 Statistical significance of observations was determined using paired student t-test. P-value  
110 less than 0.05 indicated significant.

111

112

## 113 **Results**

### 114 **The double mutant *saf1Δrrm3Δ* showed synthetic growth defects**

115 The null mutant of the SAF1 and RRM3 reported to be viable (21). Our data also showed the  
116 both single gene mutant (*saf1Δ*, *rrm3Δ*) as viable. The growth of the single gene mutant  
117 slightly reduced in comparison to WT (**Figure 1A, C**). The phase contrast imaging of the  
118 single gene mutant appeared normal just like WT however the *rrm3Δ* mutant showed the  
119 enlargement of the cell (**Figure 1 B**).The growth characteristics of the double mutant  
120 *saf1Δrrm3Δ* showed reduced growth phenotype in comparison to *saf1Δ*, *rrm3Δ* and WT when  
121 grown in YPD medium (**Figure 1 (A, C)**). It has been reported previously that the growth of  
122 the *rrm3Δ* is slower than the WT. The double mutant showed the synthetic growth defects as  
123 indicated by streaking. The growth kinetics of the *saf1Δrrm3Δ* indicated that loss of both the  
124 gene leads to synthetic growth defects.

### 125 **The *saf1Δrrm3Δ* cells exhibits Nuclear Migration defects**

126 The analysis of the nucleus using DAPI stain indicated increased percentage of cells showing  
127 multi-nuclei phenotype in *saf1Δrrm3Δ* cells in comparison to *saf1Δ*, *rrm3Δ*, and WT (Figure  
128 2A). The multi-nuclei phenotype indicated the defect in the nuclear migration..

### 129 **The *saf1Δrrm3Δ* cells showed increased Ty1 retro–transposition**

130 Ty1 elements are class of retro-transposons in the *S. cerevisiae* genome which remain in the  
131 dormant state due the host encoded genetic factors. In the absence of RRM3, the frequency  
132 of Ty1retro-transposition goes up as reported previously (15, 16). In this study the single  
133 gene mutant *saf1Δ* showed nearly 8 fold whereas the *rrm3Δ* showed the 85fold change in  
134 His<sup>+</sup> prototroph formation in comparison to WT. However the absence of both the genes  
135 (*saf1Δrrm3Δ*) leads to increased frequency (~ 180-fold) of Ty1-retro transposition in the  
136 comparison to WT cells. (Figure 3 A, B).

### 137 **Loss of SAF1 and RRM3 leads to HU and MMS sensitivity**

138 The hydroxyurea (HU) and methyl methanesulfonate (MMS) act as replication checkpoint  
139 inhibitor and DNA damaging agent respectively. The Rrm3 mutant reported to have slightly  
140 sensitive phenotype in the 200mM hydroxyurea (22). With regard to SAF1 mutant the data is  
141 not available. The semi-quantitative growth assay by spot analysis on YPD medium and

142 YPD+genotoxic agents (MMS and HU) of the WT, *saf1Δ*, *rrm3Δ* and *saf1Δrrm3Δ* indicated  
143 the extremely slow growth of the *saf1Δrrm3Δ* when compared with the WT in presence of  
144 HU and MMS (**Figure 4 A, B**). The *saf1Δ*, *rrm3Δ* also showed the reduced growth in  
145 presence of the HU and MMS when compared with the WT.

## 146 **Discussion**

147 The multi-subunit enzymes complex, Skp1-Cull1-F-box (SCF) E-3, recruits the substrate or  
148 regulatory proteins through F-box motif containing protein for poly-ubiquitination and  
149 subsequent degradation by the 26S proteasome (23, 24). The Saf1 of *S.cerevisiae* is less  
150 characterized F-box protein which contains RCC1 repeats (25). The Saf1 has been shown to  
151 involved in the phase transition through Aah1p degradation during nutrient deprivation (25). In  
152 this paper we have investigated the genetic interaction among the SAF1 and genome stability  
153 regulator RRM3. The search for the genetic interactions and their impact on phenotype is  
154 crucial for the overall understanding of the biological processes and functioning of molecular  
155 player. The investigations of the binary interactions are crucial in unearthing of the pathways  
156 for better understanding of the system biology. The null mutant of the SAF1 have been  
157 reported as viable (21), exhibited the decrease in cell death (26) phenotype and  
158 resistance to histone deacetylase inhibitor CG-1521 drug (27). In our study also SAF1 null  
159 mutant showed the decreased growth in comparison to WT. The null mutant of RRM3  
160 reported as viable (21) and showed the abnormal bud morphology (28). Our data with the  
161 *rrm3Δ*, showed the phenotype as reported earlier. The RRM3 mutant showed the slightly  
162 sensitive phenotype when grown in presence of 200mM HU (22) and MMS (0.01%) (29). In  
163 our study we observed that *rrm3Δ* showed slightly reduced growth when grown in presence  
164 of the 200mM HU and 0.035% MMS. The retro-transposition frequency in *S.cerevisiae*  
165 genome reported to be elevated (16, 30) including Ty1 (31) and Ty3 elements (32) in the null  
166 mutant of RRM3. The genetic interaction studies carried out previously reported that

167 SAF1 interact negatively with CDC 10, CDC11,CDC12, HYP2(33) and DDC1(34). The  
168 null mutant of SAF1 showed the synthetic growth defects with HSP82 (35), POL2 (36) and  
169 RTT109 (37). The *rrm3Δ* showed the synthetic growth defect with multiple genes such as  
170 CCR4, CCS1, CTF18, CTF4, CTF8, DCC1, MMS1,MRE11, PAP2, POP2, RAD51, RAD55,  
171 RAD57, RTT107, SRS2, SGS1(38)CTF8, DCC1, RAD52, RAD53 (39) in high throughput  
172 studies. However this is the first study which reports the genetic interaction among the  
173 SAF1 and RRM3 gene. Our data suggest that both the genes interact genetically to regulate  
174 the fitness of the cell and genome stability. The investigated genetic interaction may have  
175 implication for the cancer studies as there is higher degree of functional homology of Saf1p,  
176 Rrm3 with the mammalian HERC2 andPif1 helicase respectively. In conclusion, our  
177 investigation on binary genetic interaction with the SCF-3 ligase component F- box motif  
178 encoding gene SAF1 and genome stability regulator RRM3 suggest that loss of both the  
179 genes in *S. cerevisiae* reduces the growth fitness of the WT cells.

180 **Acknowledgment:** We thank to Prof. M Joan Curio, Dr. Deepak Sharma, IMTECH, Dr. Ravi  
181 Manjithya, NCBS, India for strains and plasmids.

#### 182 **Funding information**

183 This work was supported by a grant (BT/RLF/Re-entry/40/2012) from the Department of  
184 Biotechnology, GOI, New Delhi to N.K.B who is recipient of the Ramalingaswami  
185 fellowship from DBT, New Delhi.

186 **Conflict of Interest:** The authors declare that they have no conflicts of interest with the  
187 content of this article.

188 **Author's contributions:** NKB conceived and directed the study and wrote the paper with  
189 MS and VV.MS performed the experiments and analysed with NKB.VV provided the



190 bioinformatics facility and analysed the data. All the authors reviewed the results and  
191 approved the final version of manuscript.

192

193 **References:**

- 194 1. Finley D, Ozkaynak E, & Varshavsky A (1987) The yeast polyubiquitin gene is essential  
195 for resistance to high temperatures, starvation, and other stresses. *Cell* 48(6):1035-1046.
- 196 2. Escusa S, Camblong J, Galan JM, Pinson B, & Daignan-Fornier B (2006) Proteasome-  
197 and SCF-dependent degradation of yeast adenine deaminase upon transition from  
198 proliferation to quiescence requires a new F-box protein named Saf1p. *Molecular*  
199 *microbiology* 60(4):1014-1025.
- 200 3. Mark KG, Simonetta M, Maiolica A, Seller CA, & Toczyski DP (2014) Ubiquitin ligase  
201 trapping identifies an SCF(Saf1) pathway targeting unprocessed vacuolar/lysosomal  
202 proteins. *Molecular cell* 53(1):148-161.
- 203 4. Mark KG, *et al.* (2015) Prb1 Protease Activity Is Required for Its Recognition by the F-  
204 Box Protein Saf1. *Biochemistry* 54(29):4423-4426.
- 205 5. Zhou JQ, *et al.* (2002) *Schizosaccharomyces pombe* pfh1+ encodes an essential 5' to 3'  
206 DNA helicase that is a member of the PIF1 subfamily of DNA helicases. *Molecular*  
207 *biology of the cell* 13(6):2180-2191.
- 208 6. Ivessa AS, Zhou JQ, Schulz VP, Monson EK, & Zakian VA (2002) *Saccharomyces*  
209 *Rrm3p*, a 5' to 3' DNA helicase that promotes replication fork progression through  
210 telomeric and subtelomeric DNA. *Genes & development* 16(11):1383-1396.
- 211 7. Azvolinsky A, Dunaway S, Torres JZ, Bessler JB, & Zakian VA (2006) The *S. cerevisiae*  
212 *Rrm3p* DNA helicase moves with the replication fork and affects replication of all yeast  
213 chromosomes. *Genes & development* 20(22):3104-3116.
- 214 8. Mohanty BK, Bairwa NK, & Bastia D (2006) The Tof1p-Csm3p protein complex  
215 counteracts the *Rrm3p* helicase to control replication termination of *Saccharomyces*  
216 *cerevisiae*. *Proceedings of the National Academy of Sciences of the United States of*  
217 *America* 103(4):897-902.
- 218 9. Ivessa AS, *et al.* (2003) The *Saccharomyces cerevisiae* helicase *Rrm3p* facilitates  
219 replication past nonhistone protein-DNA complexes. *Molecular cell* 12(6):1525-1536.
- 220 10. Keil RL & McWilliams AD (1993) A gene with specific and global effects on  
221 recombination of sequences from tandemly repeated genes in *Saccharomyces cerevisiae*.  
222 *Genetics* 135(3):711-718.
- 223 11. Azam M, *et al.* (2006) Evidence that the *S.cerevisiae* *Sgs1* protein facilitates  
224 recombinational repair of telomeres during senescence. *Nucleic acids research* 34(2):506-  
225 516.
- 226 12. Szyjka SJ, Viggiani CJ, & Aparicio OM (2005) *Mrc1* is required for normal progression  
227 of replication forks throughout chromatin in *S. cerevisiae*. *Molecular cell* 19(5):691-697.
- 228 13. Taylor SD, *et al.* (2005) The conserved *Mec1/Rad53* nuclear checkpoint pathway  
229 regulates mitochondrial DNA copy number in *Saccharomyces cerevisiae*. *Molecular*  
230 *biology of the cell* 16(6):3010-3018.
- 231 14. Schmidt KH & Kolodner RD (2004) Requirement of *Rrm3* helicase for repair of  
232 spontaneous DNA lesions in cells lacking *Srs2* or *Sgs1* helicase. *Molecular and cellular*  
233 *biology* 24(8):3213-3226.

- 234 15. Scholes DT, Banerjee M, Bowen B, & Curcio MJ (2001) Multiple regulators of Ty1  
235 transposition in *Saccharomyces cerevisiae* have conserved roles in genome maintenance.  
236 *Genetics* 159(4):1449-1465.
- 237 16. Bairwa NK, Mohanty BK, Stamenova R, Curcio MJ, & Bastia D (2011) The intra-S  
238 phase checkpoint protein Tof1 collaborates with the helicase Rrm3 and the F-box  
239 protein Dia2 to maintain genome stability in *Saccharomyces cerevisiae*. *The Journal of*  
240 *biological chemistry* 286(4):2445-2454.
- 241 17. Salari R & Salari R (2017) Investigation of the Best *Saccharomyces cerevisiae* Growth  
242 Condition. *Electronic physician* 9(1):3592-3597.
- 243 18. Palmer RE, Koval M, & Koshland D (1989) The dynamics of chromosome movement in  
244 the budding yeast *Saccharomyces cerevisiae*. *The Journal of cell biology* 109(6 Pt  
245 2):3355-3366.
- 246 19. Palmer RE, Sullivan DS, Huffaker T, & Koshland D (1992) Role of astral microtubules  
247 and actin in spindle orientation and migration in the budding yeast, *Saccharomyces*  
248 *cerevisiae*. *The Journal of cell biology* 119(3):583-593.
- 249 20. Scholes DT, Kenny AE, Gamache ER, Mou Z, & Curcio MJ (2003) Activation of a LTR-  
250 retrotransposon by telomere erosion. *Proceedings of the National Academy of Sciences of*  
251 *the United States of America* 100(26):15736-15741.
- 252 21. Gjaever G, *et al.* (2002) Functional profiling of the *Saccharomyces cerevisiae* genome.  
253 *Nature* 418(6896):387-391.
- 254 22. Ohya T, Arai H, Kubota Y, Shinagawa H, & Hishida T (2008) A SUMO-like domain  
255 protein, Esc2, is required for genome integrity and sister chromatid cohesion in  
256 *Saccharomyces cerevisiae*. *Genetics* 180(1):41-50.
- 257 23. Hershko A & Ciechanover A (1998) The ubiquitin system. *Annual review of biochemistry*  
258 67:425-479.
- 259 24. Bai C, *et al.* (1996) SKP1 connects cell cycle regulators to the ubiquitin proteolysis  
260 machinery through a novel motif, the F-box. *Cell* 86(2):263-274.
- 261 25. Escusa S, *et al.* (2007) Skp1-Cullin-F-box-dependent degradation of Aah1p requires its  
262 interaction with the F-box protein Saf1p. *The Journal of biological chemistry*  
263 282(28):20097-20103.
- 264 26. Teng X, *et al.* (2011) Gene-dependent cell death in yeast. *Cell death & disease* 2:e188.
- 265 27. Gaupel AC, Begley T, & Tenniswood M (2014) High throughput screening identifies  
266 modulators of histone deacetylase inhibitors. *BMC genomics* 15:528.
- 267 28. Watanabe M, Watanabe D, Nogami S, Morishita S, & Ohya Y (2009) Comprehensive  
268 and quantitative analysis of yeast deletion mutants defective in apical and isotropic bud  
269 growth. *Current genetics* 55(4):365-380.
- 270 29. Ang JS, Duffy S, Segovia R, Stirling PC, & Hieter P (2016) Dosage Mutator Genes in  
271 *Saccharomyces cerevisiae*: A Novel Mutator Mode-of-Action of the Mph1 DNA  
272 Helicase. *Genetics* 204(3):975-986.
- 273 30. Curcio MJ, *et al.* (2007) S-phase checkpoint pathways stimulate the mobility of the  
274 retrovirus-like transposon Ty1. *Molecular and cellular biology* 27(24):8874-8885.
- 275 31. Nyswaner KM, Checkley MA, Yi M, Stephens RM, & Garfinkel DJ (2008) Chromatin-  
276 associated genes protect the yeast genome from Ty1 insertional mutagenesis. *Genetics*  
277 178(1):197-214.
- 278 32. Irwin B, *et al.* (2005) Retroviruses and yeast retrotransposons use overlapping sets of  
279 host genes. *Genome research* 15(5):641-654.
- 280 33. Costanzo M, *et al.* (2016) A global genetic interaction network maps a wiring diagram of  
281 cellular function. *Science (New York, N.Y.)* 353(6306).
- 282 34. Costanzo M, *et al.* (2010) The genetic landscape of a cell. *Science (New York, N.Y.)*  
283 327(5964):425-431.
- 284 35. Zhao R, *et al.* (2005) Navigating the chaperone network: an integrative map of physical  
285 and genetic interactions mediated by the hsp90 chaperone. *Cell* 120(5):715-727.

- 286 36. Dubarry M, Lawless C, Banks AP, Cockell S, & Lydall D (2015) Genetic Networks  
287 Required to Coordinate Chromosome Replication by DNA Polymerases alpha, delta,  
288 and epsilon in *Saccharomyces cerevisiae*. *G3 (Bethesda, Md.)* 5(10):2187-2197.
- 289 37. Fillingham J, *et al.* (2008) Chaperone control of the activity and specificity of the histone  
290 H3 acetyltransferase Rtt109. *Molecular and cellular biology* 28(13):4342-4353.
- 291 38. Pan X, *et al.* (2006) A DNA integrity network in the yeast *Saccharomyces cerevisiae*. *Cell*  
292 124(5):1069-1081.
- 293 39. Tong AH, *et al.* (2004) Global mapping of the yeast genetic interaction network. *Science*  
294 (*New York, N.Y.*) 303(5659):808-813.

295

296

297

298

299

300

301

302

303

304

305

306

307

308

309

310

311

312

313

314

315

316

317

318 **Tables:**

319 **Table 1: List of primers used for construction of deletion strains**

| S.N. | Primer name      | Sequence                                                                  |
|------|------------------|---------------------------------------------------------------------------|
| 1    | Saf1/<br>YBR280c | F-5'CCAAAGGATATACTCTCAATTATAAAATGGAAAAGCACATC<br>CGGATCCCCGGGTTAATTAA-3'  |
|      |                  | R-5'ACGGAATCCAAAATGCAAAATCGAAATGACACCTAAAAA<br>TGAATTCGAGCTCGTTTAAAC-3'   |
| 2    | Rrm3             | F-5'AATTATCACTATCATTTCAGCCCAATAAACAGCTGAAAAGACGGATC<br>CCCGGGTTAATTAA-3'  |
|      |                  | R-5'AAATAACATAAAACAAACAACCTCCGAACAATAACTAAGTACGAAT<br>TCGAGCTCGTTTAAAC-3' |
| 3    | Rrm3 Leu         | F-5'AGCTCAAAAGTCGAGAGATTTGTTCTTATAAGACATCCCGCCAAC<br>GTGGGAATACTCAG-3'    |
|      |                  | R-5'TCAAACCTCAACTAGAGTATATGCATTTATTCGTTGCAAGTTGGCCC<br>GAAATCCCCTAC-3'    |

320

321 **Table 2: List of plasmids used for generating deletion cassette with selectable marker**

| S.no. | Plasmid Name   | Deletion casttee | PCR product size | Selection Media |
|-------|----------------|------------------|------------------|-----------------|
| 1     | pFA6a- KanMX6  | <i>KanMX6</i>    | 1559 bp          | YPD + G418      |
| 2     | pFA6a- His3MX6 | <i>His3M X6</i>  | 1403 bp          | SC His -        |

322

323

324

325

326 **Table 3: Yeast strains and their genotype used in the study**

| S.no. | Strain             | Genotype                                                                                       | Source                    |
|-------|--------------------|------------------------------------------------------------------------------------------------|---------------------------|
| 1     | BY4741 WT          | <i>MATa his3Δ1 leu2Δ0 met15Δ0 ura3Δ0</i>                                                       | Dr. Deepak Sharma, IMTECH |
| 2     | <i>saf1Δ</i>       | <i>saf1Δ::His3MX</i>                                                                           | This study                |
| 3     | <i>rrm3Δ</i>       | <i>rrm3Δ::KanMX</i>                                                                            | This study                |
| 4     | <i>saf1Δ rrm3Δ</i> | <i>saf1Δ::His3MX, rrm3Δ::KanMX</i>                                                             | This study                |
| 5     | JC2326             | <i>MAT-ura3, cir0, ura3-167, leu: his, his32Ty1his3AI-270, Ty1NEO-588, Ty1 (tub: lacs)-146</i> | Prof. M Joan Curcio       |
| 6     | MS1                | <i>saf1Δ::KanMX</i>                                                                            | This study                |
| 7     | MS2                | <i>rrm3Δ::KanMX</i>                                                                            | This study                |
| 8     | MS3                | <i>saf1Δ::KanMX, rrm3Δ::LEU2</i>                                                               | This study                |

327

328 **Legends and Figures:**

329 **Figure 1.** Comparative analysis of growth and morphology of WT, *saf1Δ*, *rrm3Δ*,  
330 *saf1Δrrm3Δ* strains. A. Growth of streaked strains on YPD plates, streaked culture were  
331 incubated for 2-3 days at 30°C and then photographed. B. Phase contrast images of log phase  
332 cultures at 100X magnification using Leica DM3000. C. Growth kinetics of strains (WT,  
333 *saf1Δ*, *rrm3Δ*, *saf1Δrrm3Δ*). Cells were collected every 2 hour period and cellular growth  
334 was measured by optical density (OD) at 600 nm using TOSHVIN UV- 1800 SHIMADZU.  
335 The data shown represent the average of three independent experiments the error bars seen  
336 represent the standard deviation for each set of data.

337

338 **Figure 2.** Assessment of nuclear migration phenotype using DAPI (4',6-diamidino-2-  
339 phenylindole) staining of WT, *saf1* $\Delta$ , *rrm3* $\Delta$ , *saf1* $\Delta$ *rrm3* $\Delta$ . A. Representative Images of WT,  
340 *saf1* $\Delta$ , *rrm3* $\Delta$ , *saf1* $\Delta$ *rrm3* $\Delta$  cells showing the status of Nuclear DNA migration. The images  
341 were acquired at the 100X magnification using Leica DM3000 fluorescent microscope. B  
342 Table showing the percentage from the count of 200 cells as, 0, 1, 2 and multi nucleus in each  
343 strain, more than two nuclei indicate the nuclear migration defect.

344 **Figure 3.** Assay for genome instability by measuring of *his3AI* marked Ty1 transposition  
345 frequency in WT, *saf1* $\Delta$ , *rrm3* $\Delta$ , *saf1* $\Delta$ *rrm3* $\Delta$ . A Images of plates showing the Ty1  
346 transposition induced colonies on Synthetic Dropout (SD) plate lacking histidine. B. Bar  
347 diagram showing the frequency of Ty1*his3AI* transposition in each strain. The data shown  
348 represent the average of three independent experiments. The significance of transposition was  
349 determined by using two tailed t-test. P-value (p) less than 0.05 indicates significant  
350 difference and the symbol \* represent to p<0.05..

351 **Figure 4.** Comparative assessment of growth phenotype of WT, *saf1* $\Delta$ , *rrm3* $\Delta$  and  
352 *saf1* $\Delta$ *rrm3* $\Delta$  strains in presence of 0.035% MMS and 200mM HU genotoxic stress causing  
353 agents. Each strain was grown to log phase and was equalized by O.D at 600 nm. The  
354 tenfold serially diluted samples of each strains spotted on YPD, YPD+stress agent containing  
355 agar plates. The result indicates that *saf1* $\Delta$ *rrm3* $\Delta$  double mutant exhibits the sensitivity in the  
356 presence of HU and MMS.

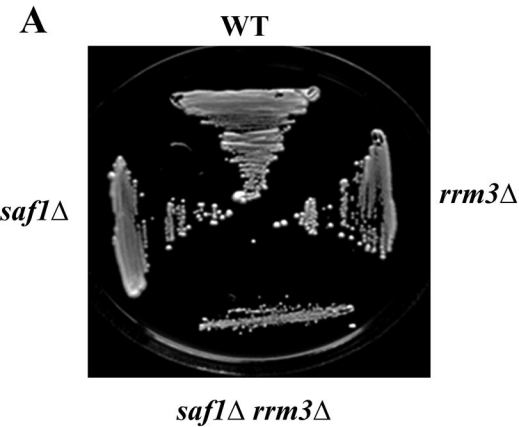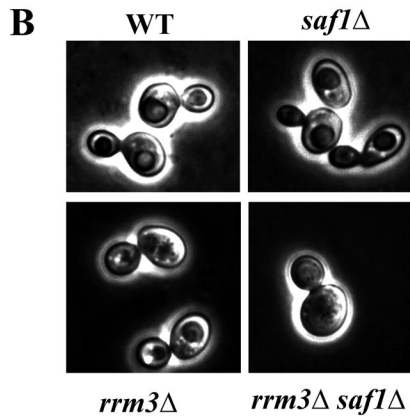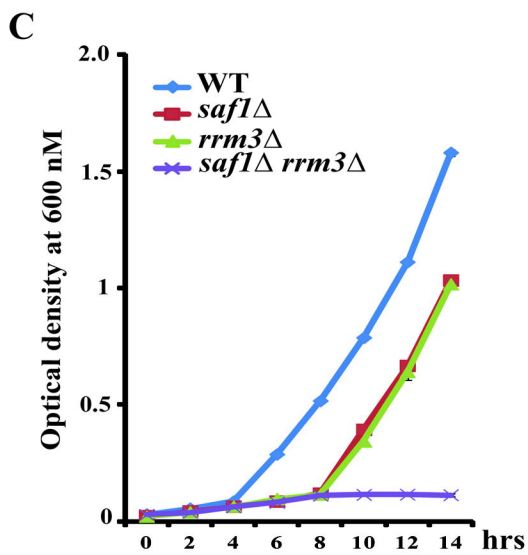

**A**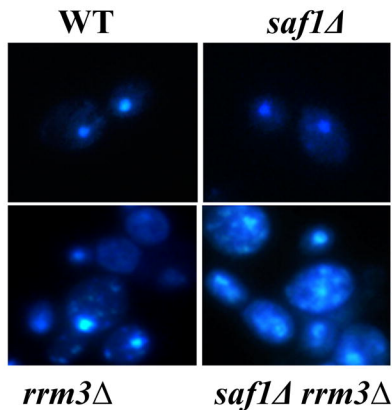**B Nuclear Migration Phenotype**

| Yeast Strain       | 0 Nucleus per cell | 1 Nucleus per cell | 2 Nucleus per cell | Multi Nucleus per cell |
|--------------------|--------------------|--------------------|--------------------|------------------------|
| BY4741 WT          | 0%                 | 80%                | 20%                | 0%                     |
| <i>saf1Δ</i>       | 5%                 | 45%                | 30%                | 20%                    |
| <i>rrm3Δ</i>       | 4%                 | 19%                | 14%                | 63%                    |
| <i>saf1Δ rrm3Δ</i> | 2%                 | 12%                | 9%                 | 78%                    |



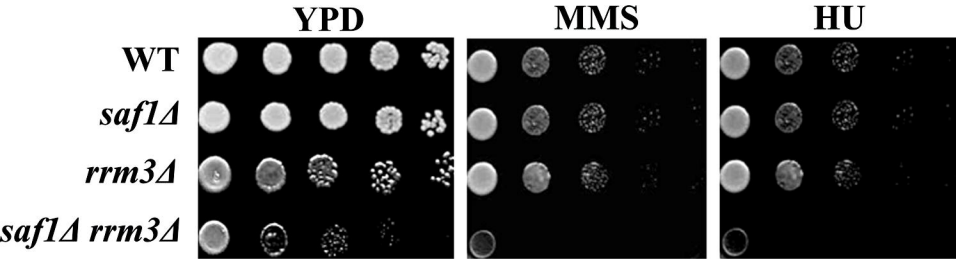

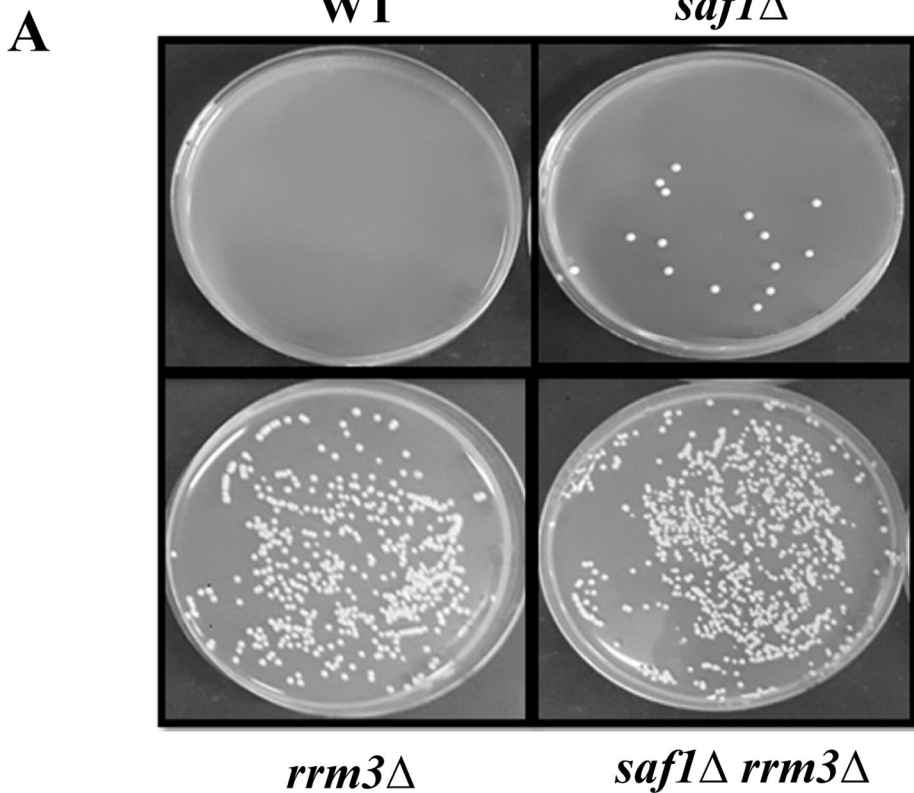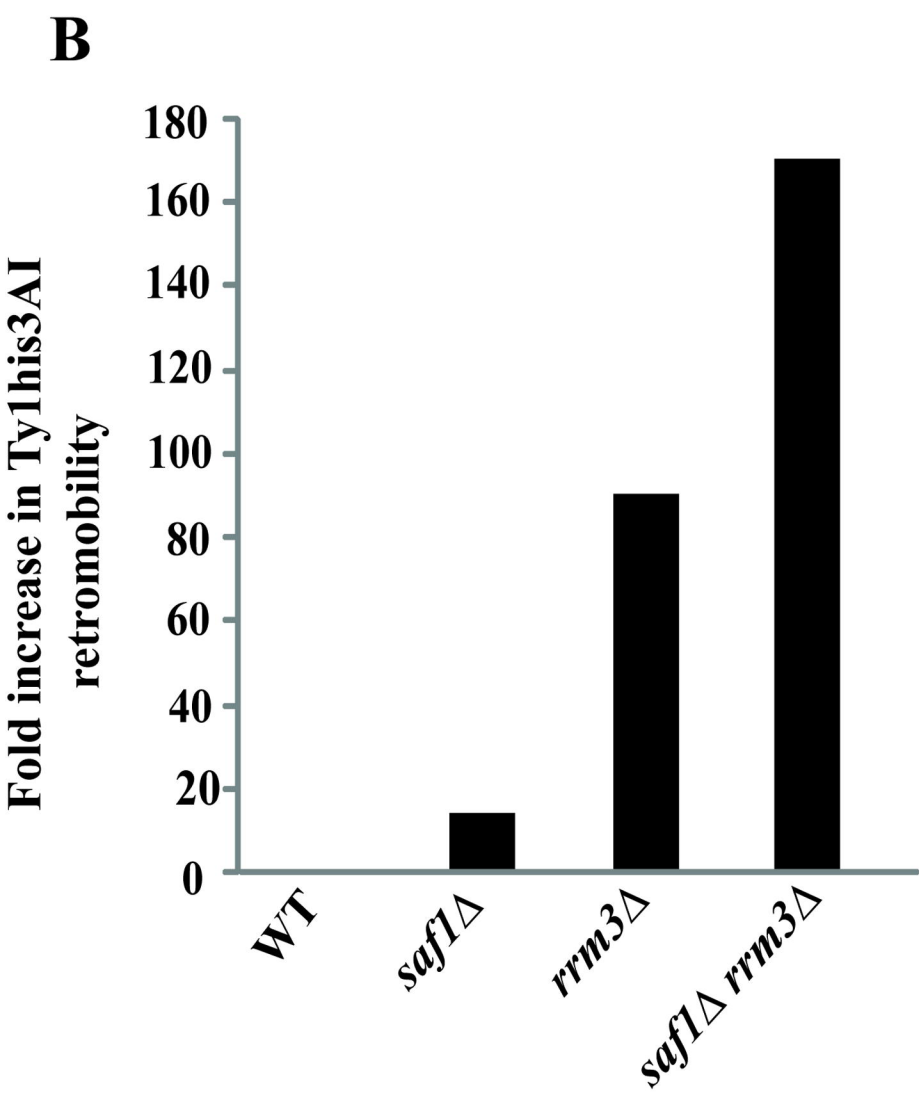

Source: https://www.biorxiv.org/content/10.1101/636902v1.full.pdf
